# Supplementary material for: SIAH1-mediated RPS3 ubiquitination contributes to chemosensitivity in epithelial ovarian cancer
Source: Aging (Albany NY). 2022 Aug 8;14(15):6202–26. doi: 10.18632/aging.204211 (PMC9417229; doi:10.18632/aging.204211)
Supplement: Supplementary Figures [file aging-14-204211-s002.pdf]

## SUPPLEMENTARY FIGURES

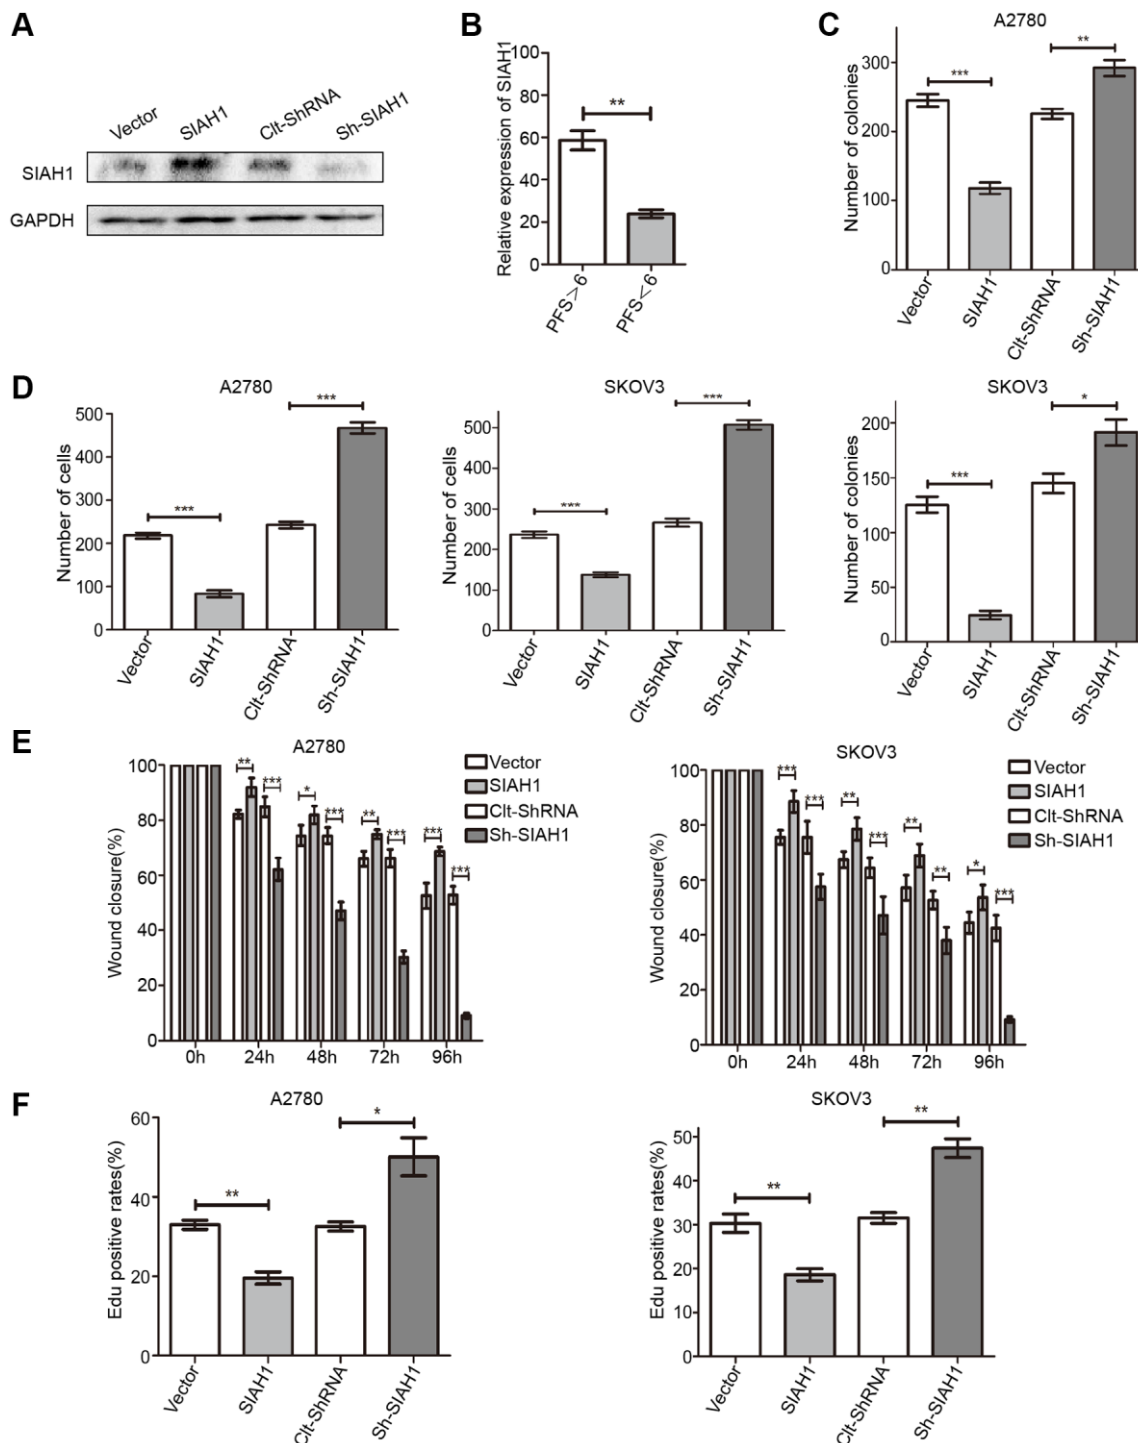

**Supplementary Figure 1. SIAH1 sensitizes ovarian cancer cells to cDDP.** (A) Western blotting for SIAH1 in A2780 cells transfected with Vector, SIAH1, CIt-shRNA and sh-SIAH1 were shown. (B) Relative SIAH1 expression in tumor specimens from ovarian cancer patients with PFS > 6 months vs. PFS < 6 months. A2780 cells and SKOV3 cells were separately transfected with Vector, SIAH1, CIt-shRNA and sh-SIAH1 for 48 h, the number of cell colonies (C), the cell number of transwell (D), the calculation of wound closure percentage (0, 24, 48, 72 and 96 h) (E), Edu positive rates (F) were measured in A2780 cells and SKOV3 cells respectively. \* $p < 0.05$ , \*\* $p < 0.01$ , \*\*\* $p < 0.001$ .



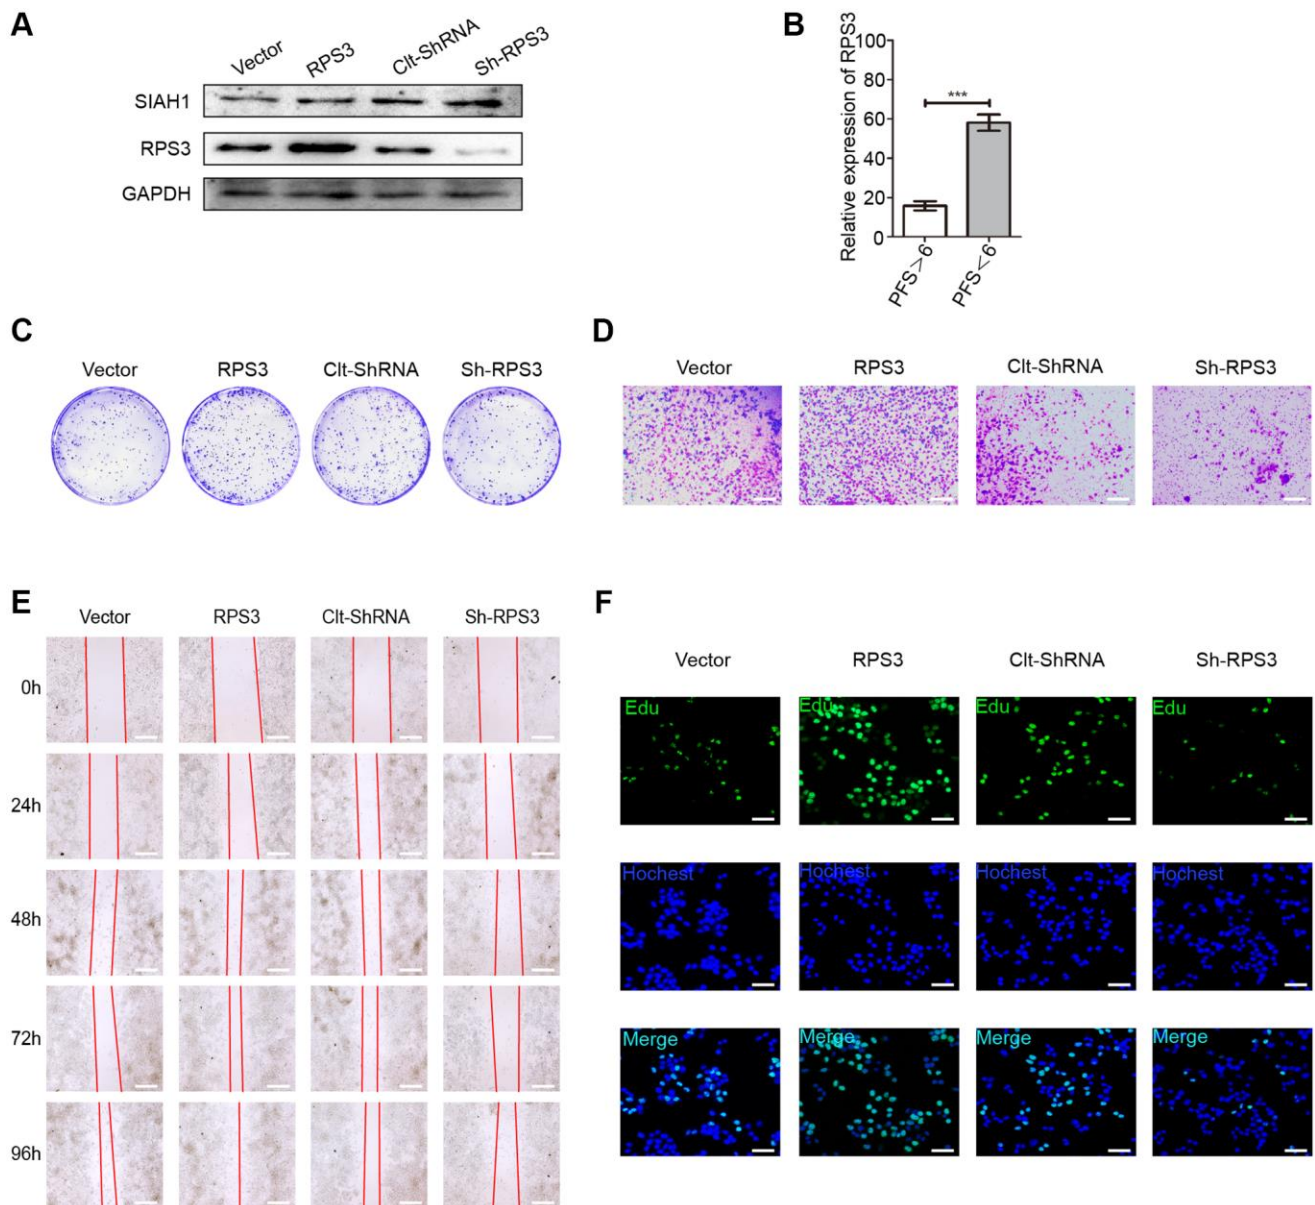

**Supplementary Figure 3. SIAH1 down-regulates the protein level of RPS3.** (A) Western blotting for SIAH1 and RPS3 in A2780 cells transfected with Vector, RPS3, Ctl-shRNA and sh-RPS3 for 48 h. (B) Relative RPS3 expression in tumor specimens from ovarian cancer patients with PFS > 6 months vs. PFS < 6 months. Cell colonies assay (C) and Transwell assay (D) of A2780 cells transfected with Vector, RPS3, Ctl-shRNA and sh-RPS3 were shown. Scale bar: 400  $\mu$ m. The wound-healing assay was used to assess the effects of RPS3 on cellular motility over time as shown (0, 24, 48, 72 and 96 h; Scale bar: 400  $\mu$ m) (E) and Cell Edu assay (Scale bar: 200  $\mu$ m) (F) were analyzed in A2780 cells respectively. \*\*\* $p$  < 0.001.
